# Supplementary material for: 3Mg/Mg2Sn anodes with unprecedented electrochemical performance towards viable magnesium-ion batteries
Source: Royal Society of Chemistry journal article supplement (doi:10.1039/d0ta05828a), 2020-01-01
Supplement: d0ta05828a1.pdf [file d0ta05828a1.pdf]

## Supporting Information

### 3Mg/Mg<sub>2</sub>Sn Anodes with Unprecedented Electrochemical Performance towards Viable Magnesium-ion Batteries

Amol Bhairuba Ikhe, Su Cheol Han, S. J. Richard Prabakar, Woon Bae Park,\* Kee-Sun Sohn,\* and Myoungho Pyo\*

A. B. Ikhe, Dr. S. C. Han, Dr. S. J. R. Prabakar, Prof. W. B. Park, Prof. M. Pyo  
Department of Printed Electronics Engineering, Suncheon National University, Chonnam 57922, Republic of Korea  
E-mail: wbpark@scnu.ac.kr, mho@sunchon.ac.kr  
Prof. K.-S. Sohn  
Faculty of Nanotechnology and Advanced Materials Engineering, Sejong University, Seoul 05006, Republic of Korea  
E-mail: kssohn@sejong.ac.kr

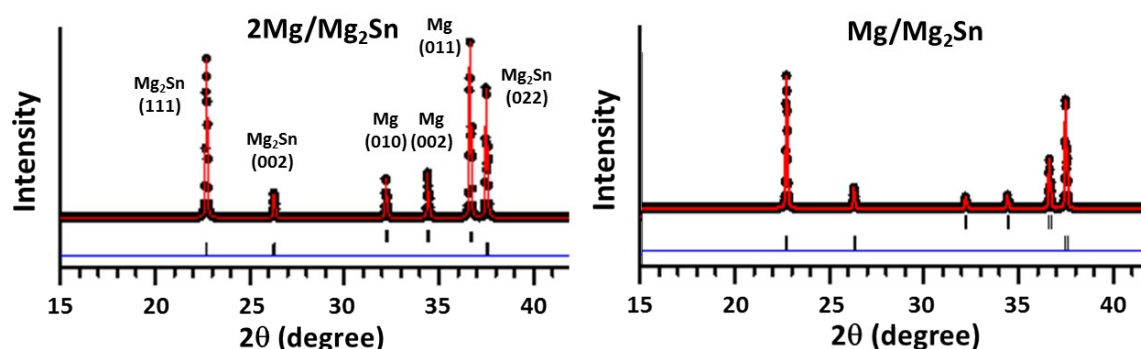

**Fig. S1.** Simulated XRD pattern for nMg/Mg<sub>2</sub>Sn. Vertical tick marks above the blue line represent the Bragg's reflections for Mg and Mg<sub>2</sub>Sn phases. For obtaining a simulated pattern, the Fullprof program was set to Pattern calculation (X-ray). The structural parameters were obtained from ICSD collection codes 53767 and 151368 for Mg and Mg<sub>2</sub>Sn phases, respectively. Arbitrary values for the scale factor of the two phases were chosen in such a way that the phase fractions obtained after the simulation meet the desired ratio, i.e. Mg:Mg<sub>2</sub>Sn = 1:1 and 1:2. Peak shape and peak width was modeled using a Pseudo-Voigt function and a Caglioti equation for FWHM, respectively.

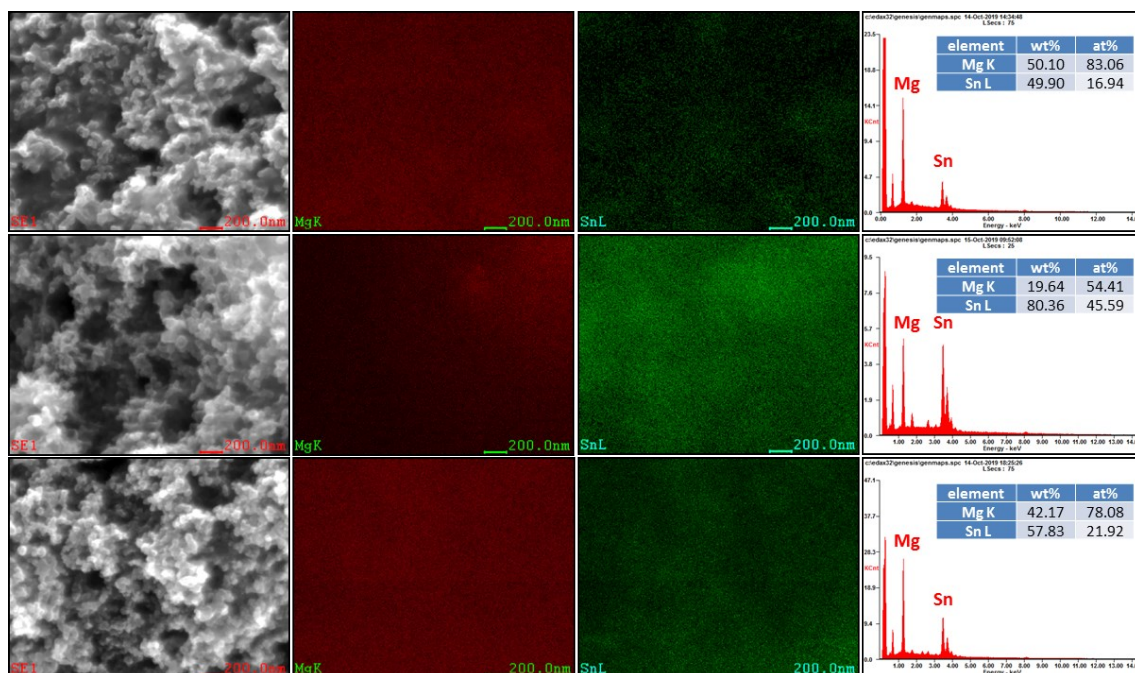

**Fig. S2.** FESEM images, elemental maps, and EDX spectra for (top) pristine, (middle) 1<sup>st</sup> demagnesiated, and (bottom) re-magnesiated 3Mg/Mg<sub>2</sub>Sn.

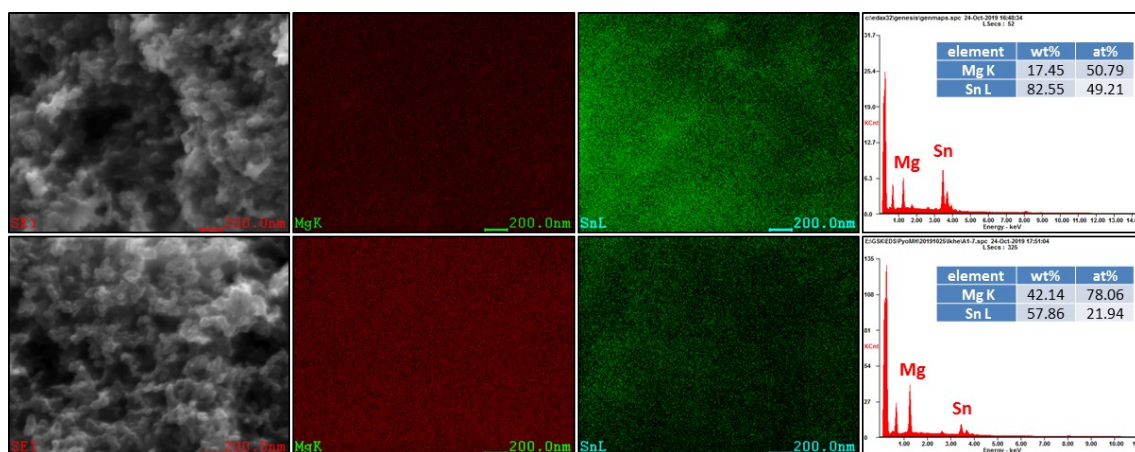

**Fig. S3.** FESEM images, elemental maps, and EDX spectra for (top) demagnesiated, and (bottom) magnesiated 3Mg/Mg<sub>2</sub>Sn after 3 C/D.

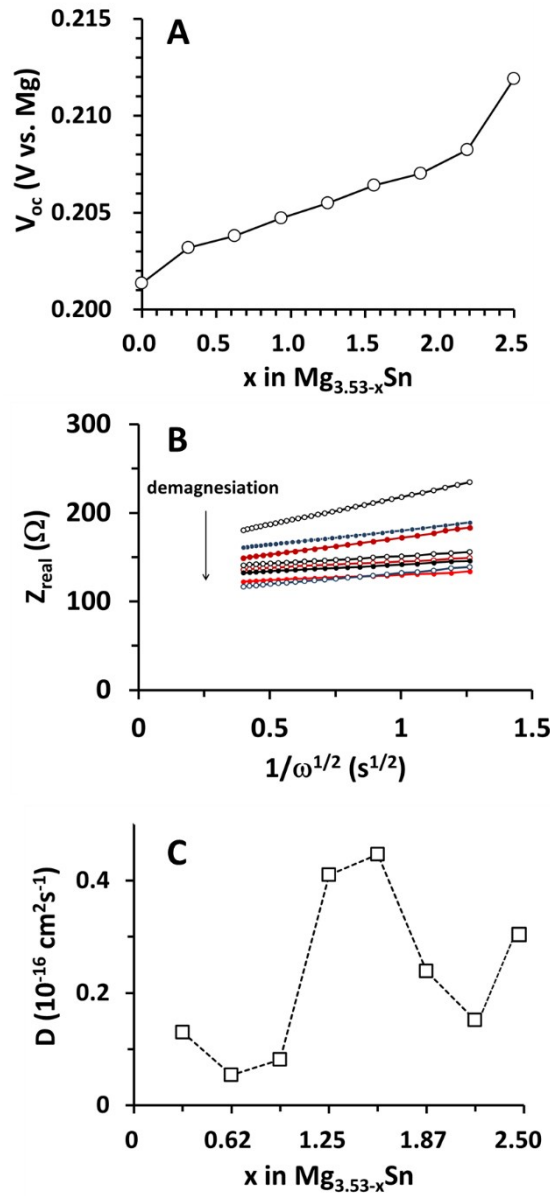

**Fig. S4.** (A) Coulometric titration curve determined using a galvanostatic intermittent titration technique. (B) Warburg plot obtained from Fig. 5C. (D) Evolution of diffusion coefficients (Ds) at different stages of magnesian. The Ds were calculated using a Warburg constant ( $\sigma$ ) that was determined from a slope in (B) and the equation  $\sigma = V_M \cdot (dV_{oc}/dx)/(zF A m (2D)^{0.5})$ , in which  $V_M$  is the molar volume of  $Mg_2Sn$  ( $46.6 cm^3 mol^{-1}$ ),  $z$  is the charge of mobile ions (2),  $F$  is the Faraday constant ( $96485 C mol^{-1}$ ),  $A$  is the BET surface area ( $65.2 m^2 g^{-1}$ ; We used the BET value determined for de-magnesian 3Mg/ $Mg_2Sn$ .), and  $m$  is the mass of active materials.

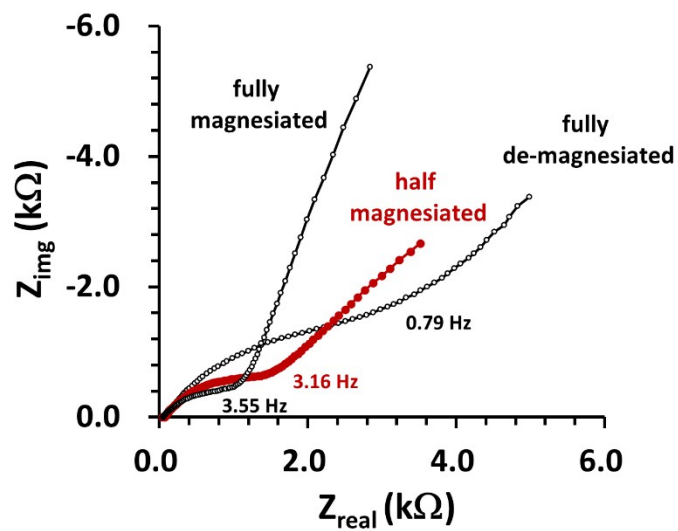

**Fig. S5.** EIS spectra of  $\text{Mg}_2\text{Sn}$  after 3 C/D cycles. Frequencies were changed within 0.1 and 100 kHz. In contrast to the behaviors of  $3\text{Mg}/\text{Mg}_2\text{Sn}$ , impedances were increased with de-magnesiation.

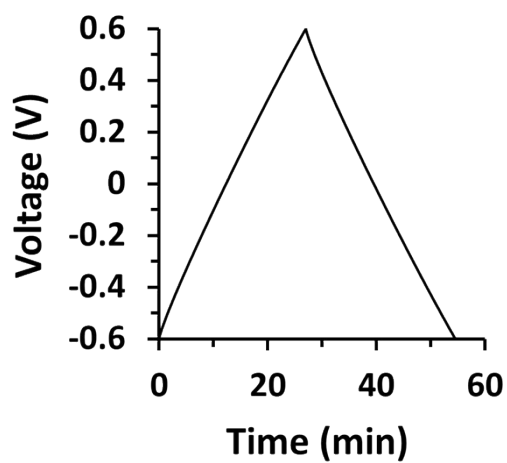

**Fig. S6.** Galvanostatic C/D curves of an AC symmetric cell at  $10 \text{ mA g}^{-1}$  in  $\text{Mg}(\text{TFSI})_2/\text{acetonitrile}$ . The capacitance of the AC was calculated to be  $56.7 \text{ F g}^{-1}$ .

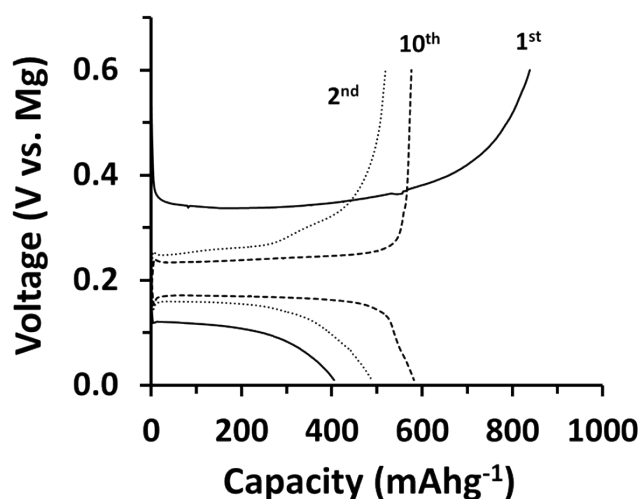

**Fig. S7.** C/D profiles of pristine 3Mg/Mg<sub>2</sub>Sn in Mg(TFSI)<sub>2</sub>:MgCl<sub>2</sub>(0.5M:0.5M)/diglyme at 200 mA g<sup>-1</sup> with Mg metal as a reference electrode. No low-voltage process appeared during the 1<sup>st</sup> de-magnesiumation, with a low discharge capacity. Though the reversibility was evident, the subsequent C/D cycles delivered inferior capacities. Stable plateau voltage behaviors were reached after 10 C/D cycles, by contrast to those of 3Mg/Mg<sub>2</sub>Sn in Mg(HMDS)<sub>2</sub>:MgCl<sub>2</sub>/THF.

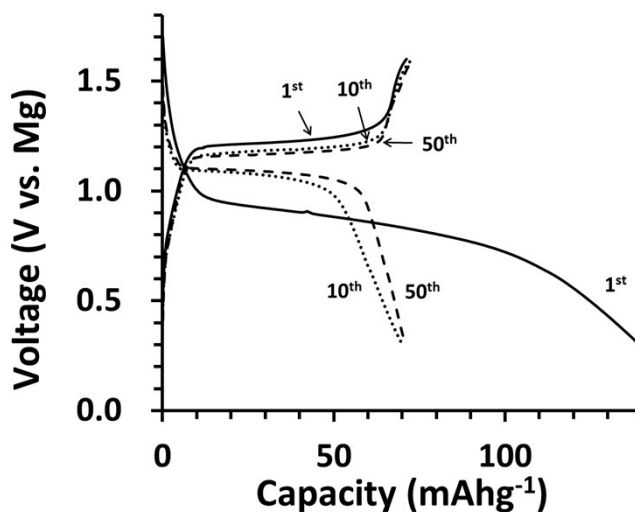

**Fig. S8.** C/D profiles of Mo<sub>6</sub>S<sub>8</sub> in Mg(HMDS)<sub>2</sub>:MgCl<sub>2</sub>/THF using Mg metal as a reference electrode. Profile shapes and capacities were similar to those obtained in 3Mg/Mg<sub>2</sub>Sn | Mg(HMDS)<sub>2</sub>:MgCl<sub>2</sub>/THF | Mo<sub>6</sub>S<sub>8</sub> (Fig. 6C). Current density = 12.8 mA g<sup>-1</sup>.
